# Supplementary material for: Ground Penetrating Radar of Neotectonic Folds and Faults in South-Central Australia: Evolution of the Shallow Geophysical Structure of Fault-Propagation Folds with Increasing Strain
Source: MDPI journal article supplement (doi:10.3390/geosciences12110395), 2022-10-26
Supplement: s1 [file s1]

Archive with 3 entries (3 files):
- Supplementary Figures S1-S10.pdf
- Supplementary Figures S11-S21.pdf
- Supplementary Table S1.xlsx
