# Supplementary material for: Ground Penetrating Radar of Neotectonic Folds and Faults in South-Central Australia: Evolution of the Shallow Geophysical Structure of Fault-Propagation Folds with Increasing Strain
Source: MDPI journal article supplement (doi:10.3390/geosciences12110395), 2022-10-26
Supplement: s1 [file s1 › Supplementary Figures S11-S21.pdf]

## SUPPLEMENTARY MATERIALS

Uninterpreted Nullarbor & Roe Plain transects, Figures S11 – S21

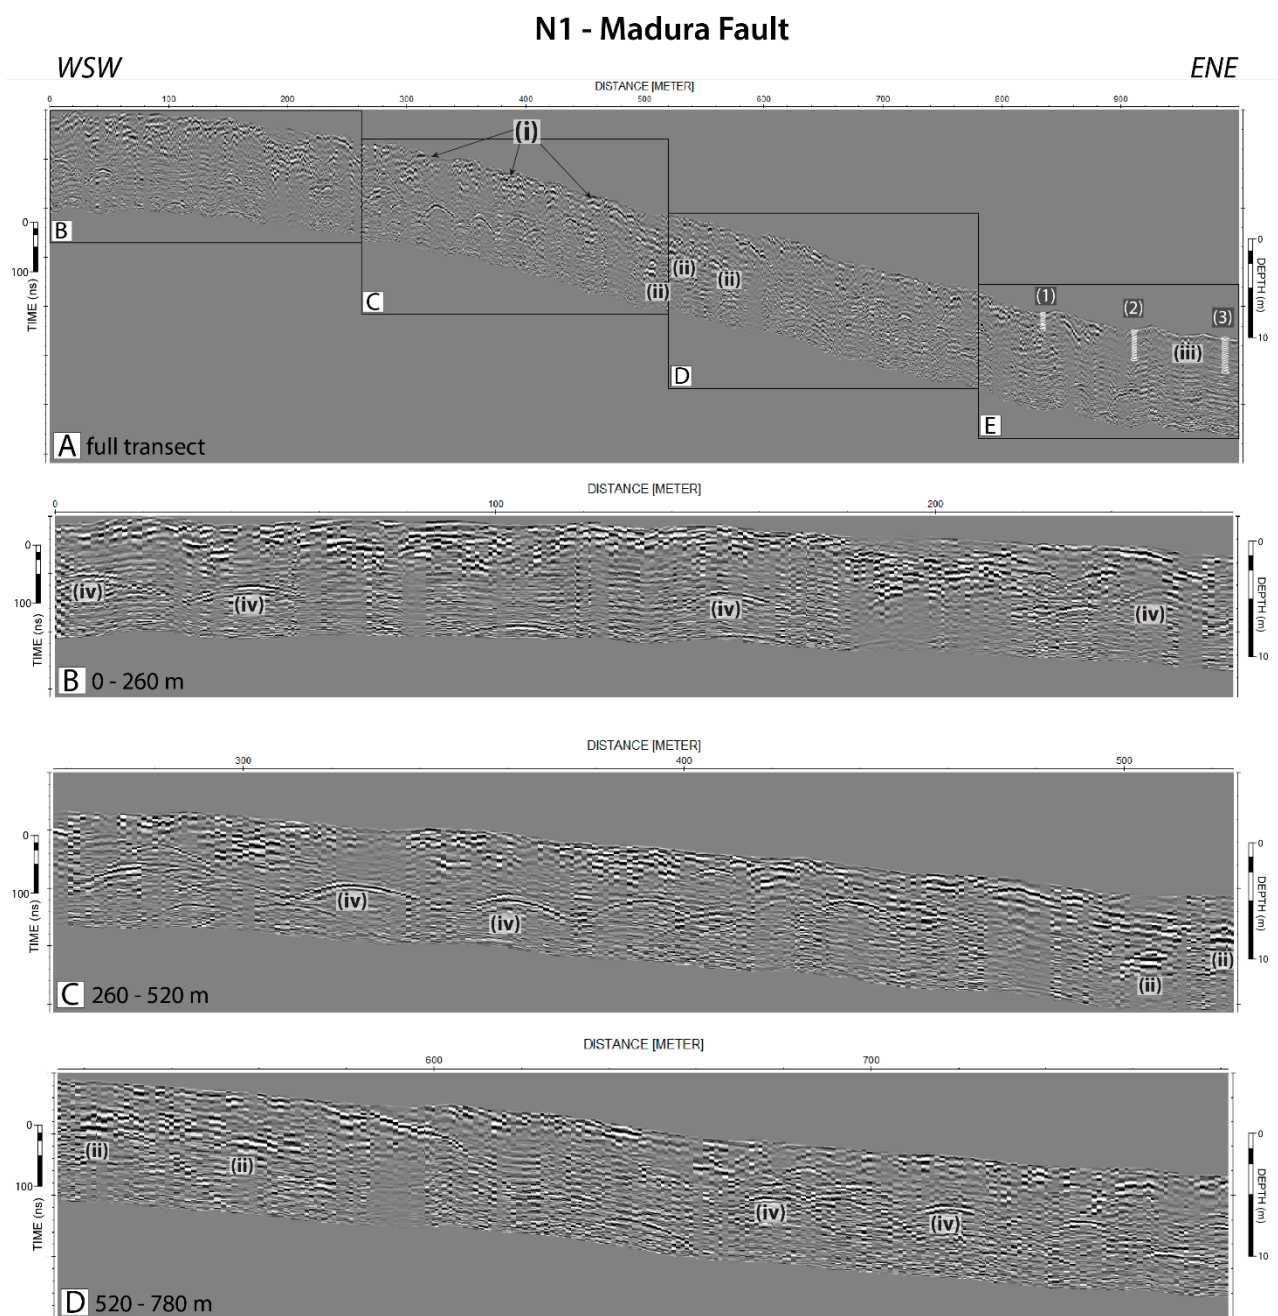

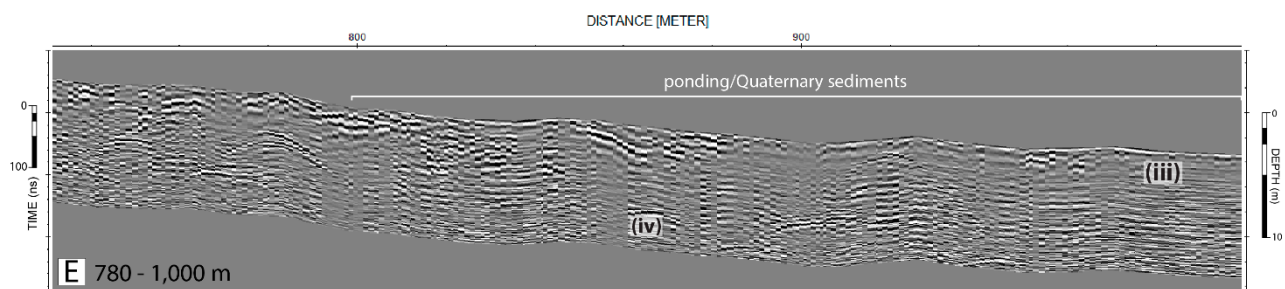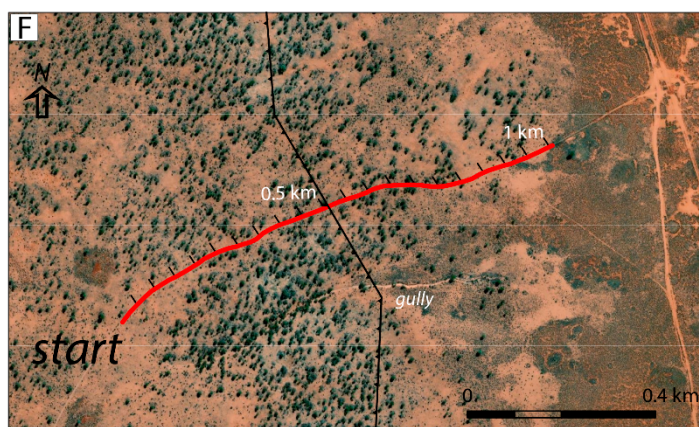

Figure S11 Uninterpreted GPR transect N1.

## N2 - Gunnadorah Channel

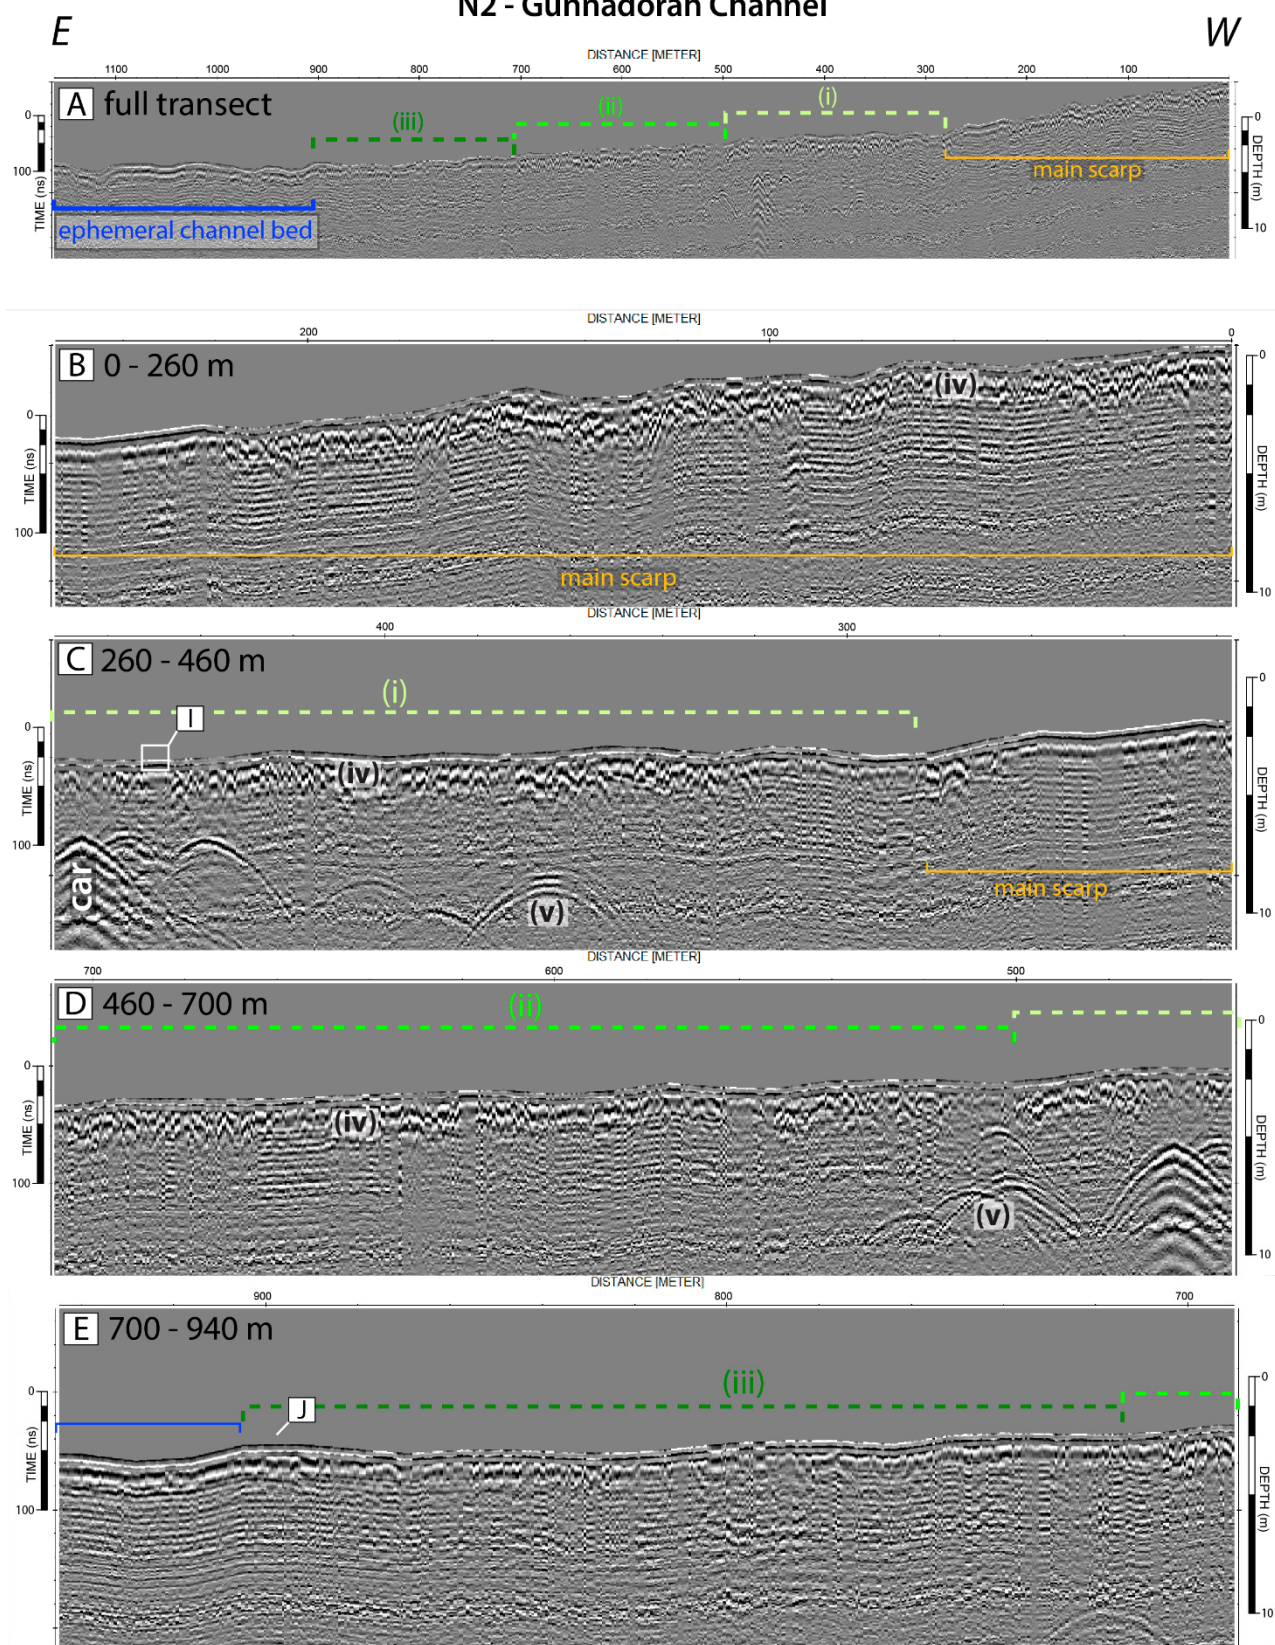

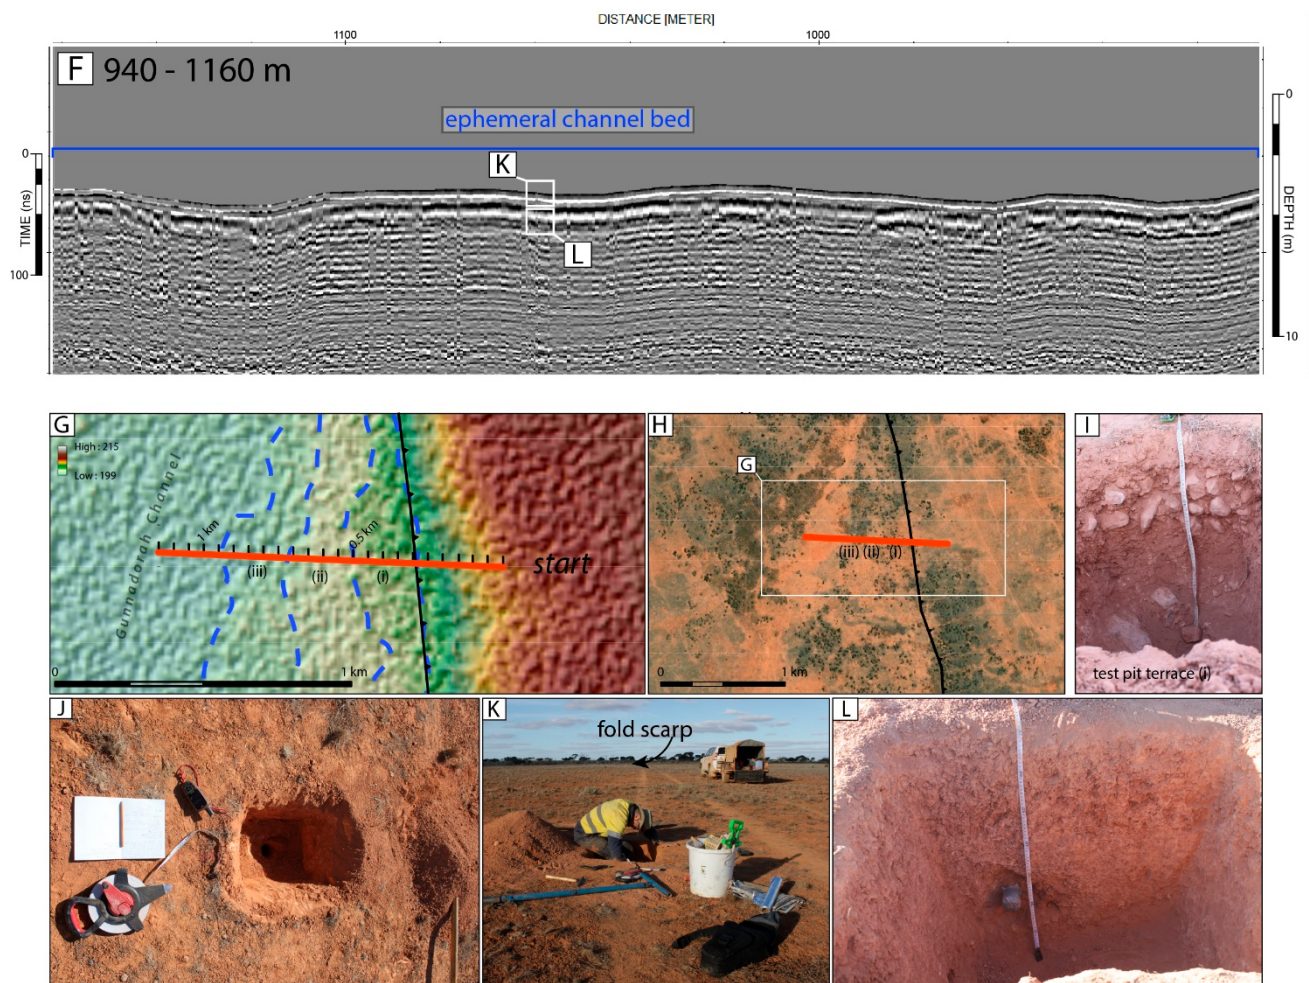

**Figure S12** Uninterpreted GPR transect N2.

### N3 - Roe Plain

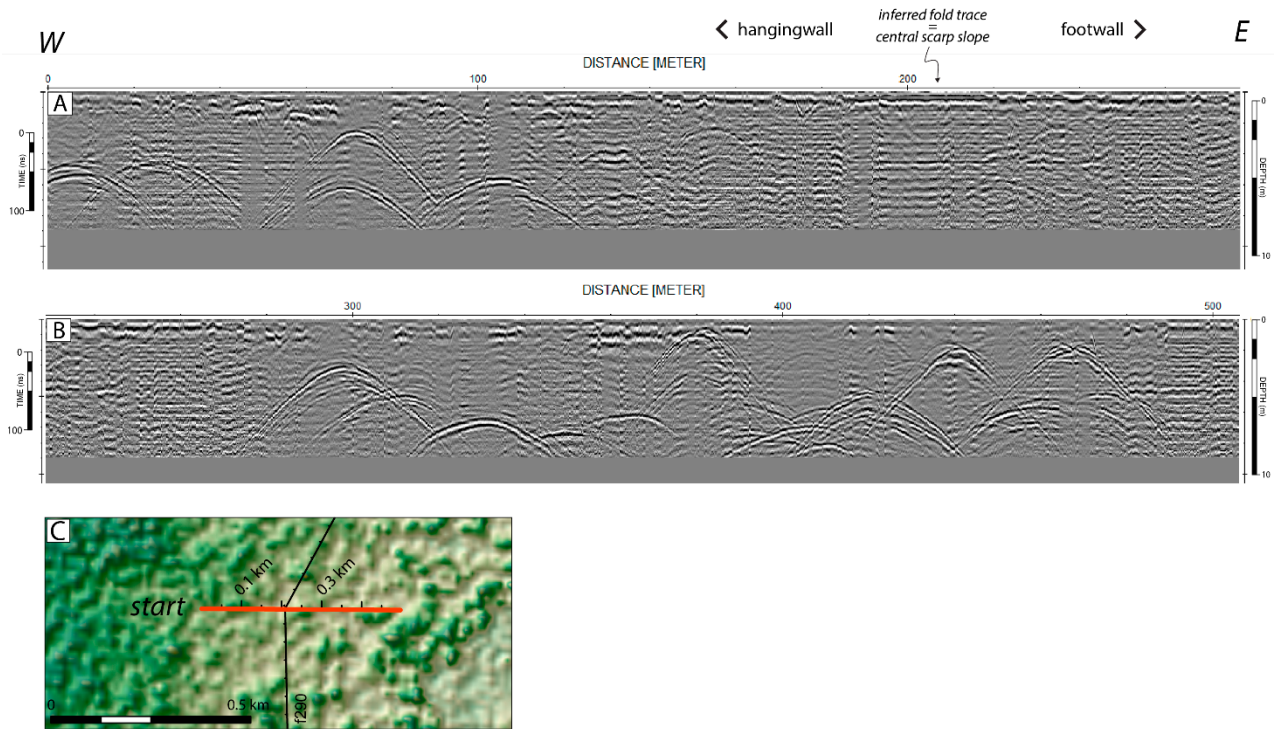

**Figure S13** Uninterpreted GPR transect N3.

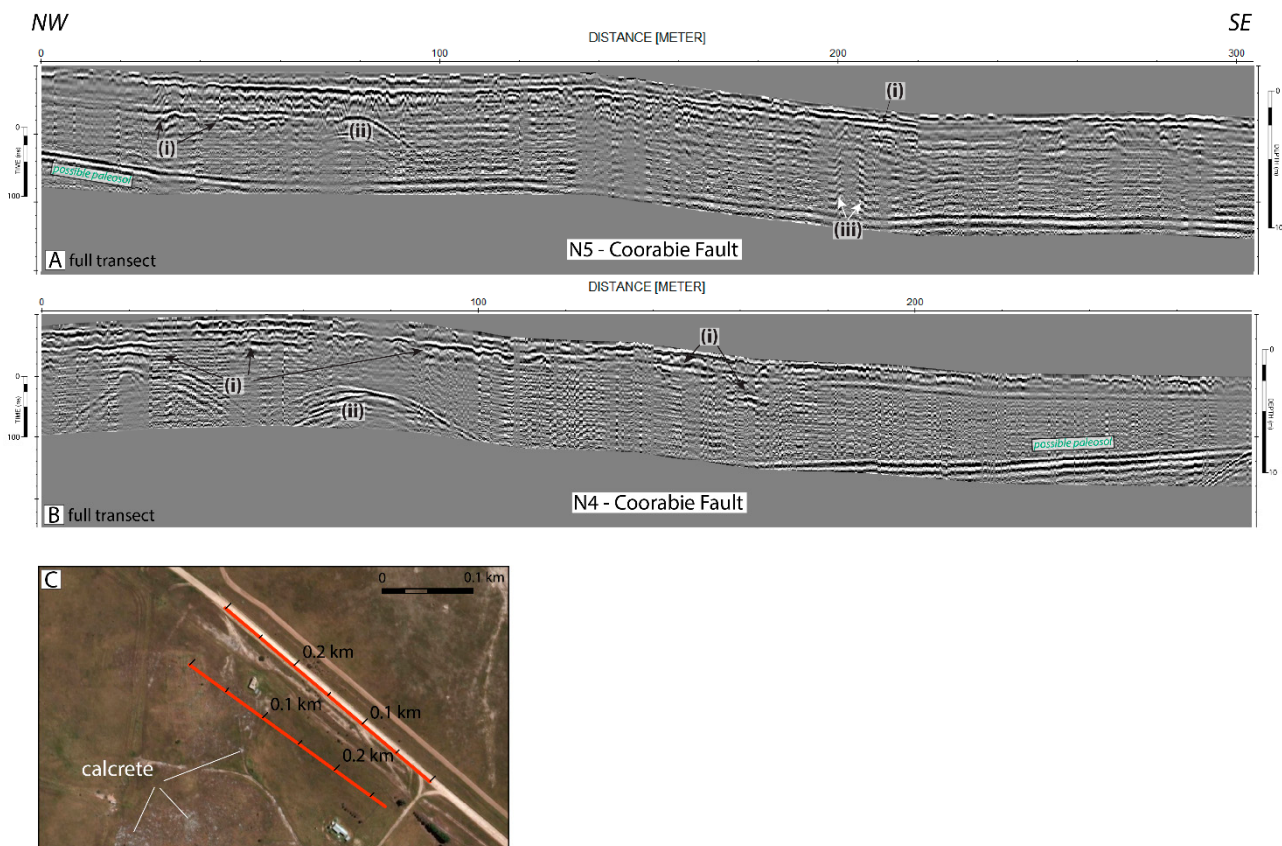

**Figure S14** Uninterpreted GPR transect N4 and N5.

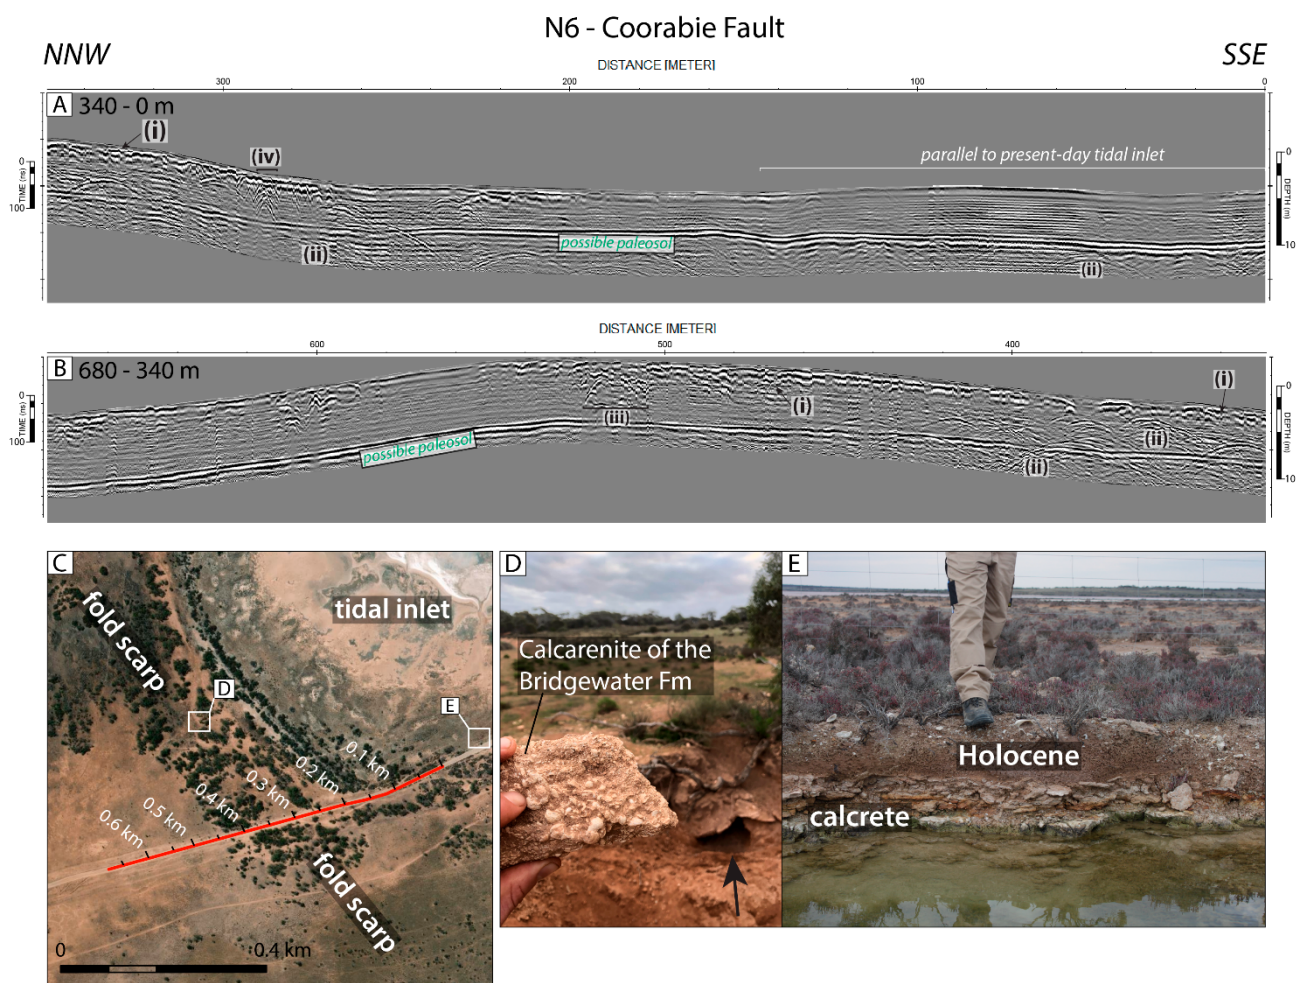

**Figure S15** Uninterpreted GPR transect N6.

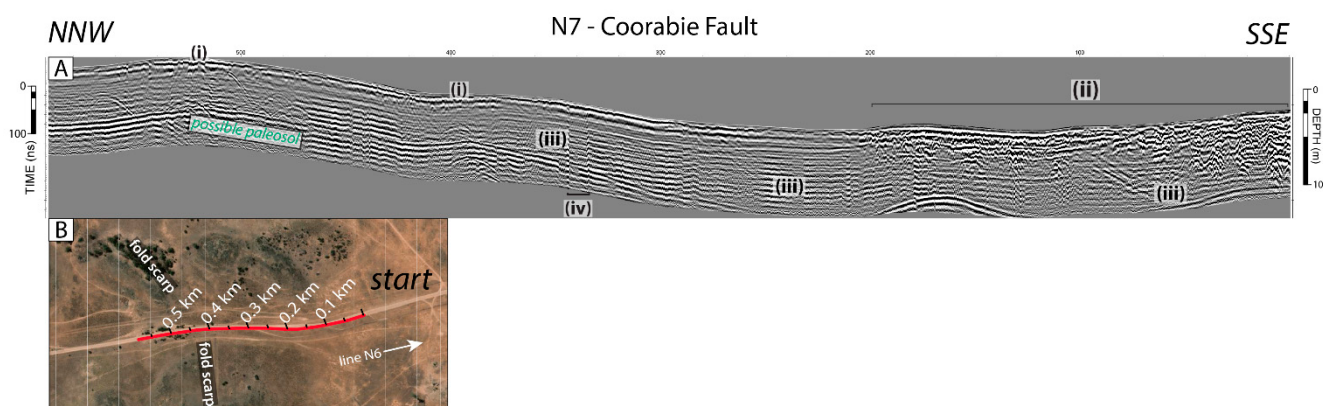

**Figure S16** Uninterpreted GPR transect N7

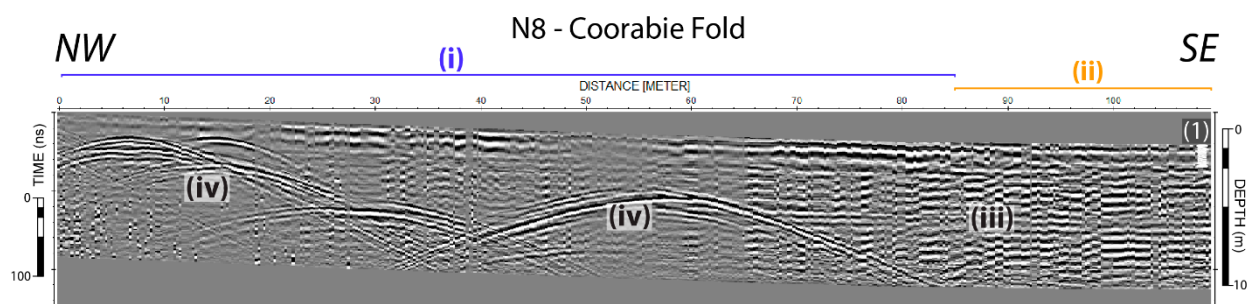

Figure S17 Uninterpreted GPR transect N8.

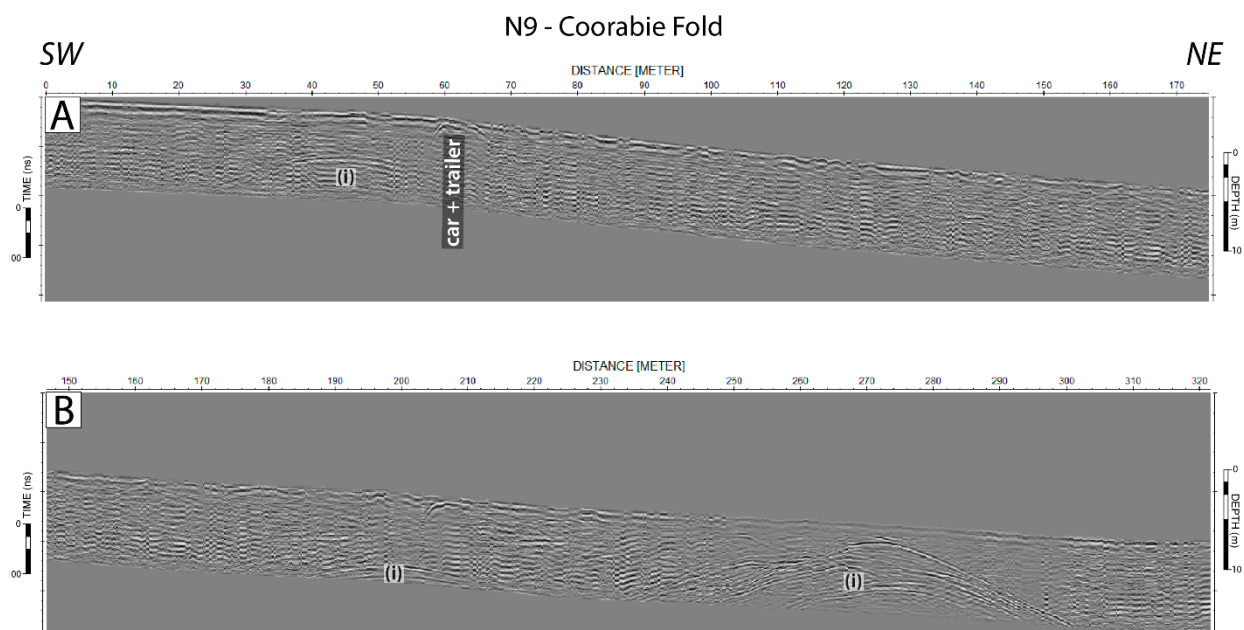

Figure S18 Uninterpreted GPR transect N9.

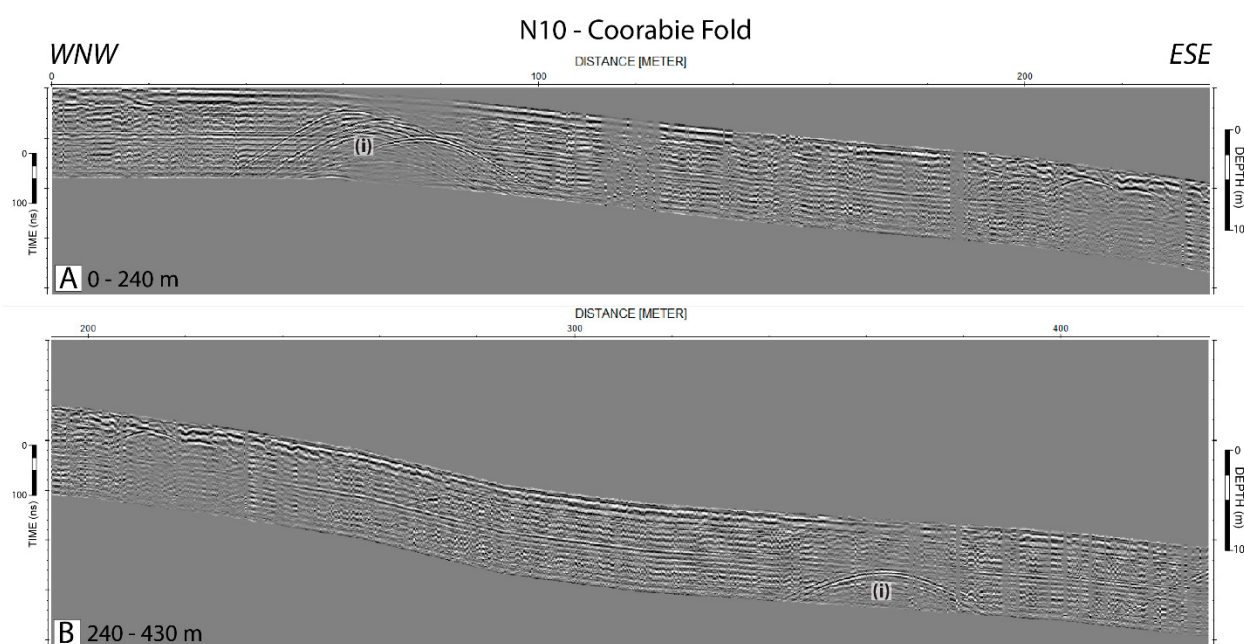

Figure S19 Uninterpreted GPR transect N10.

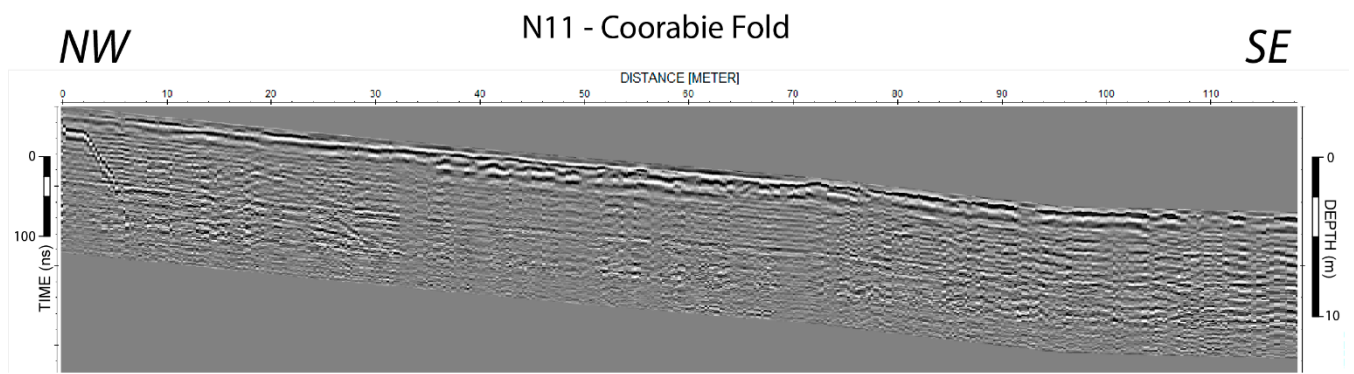

**Figure S20** Uninterpreted GPR transect N11.

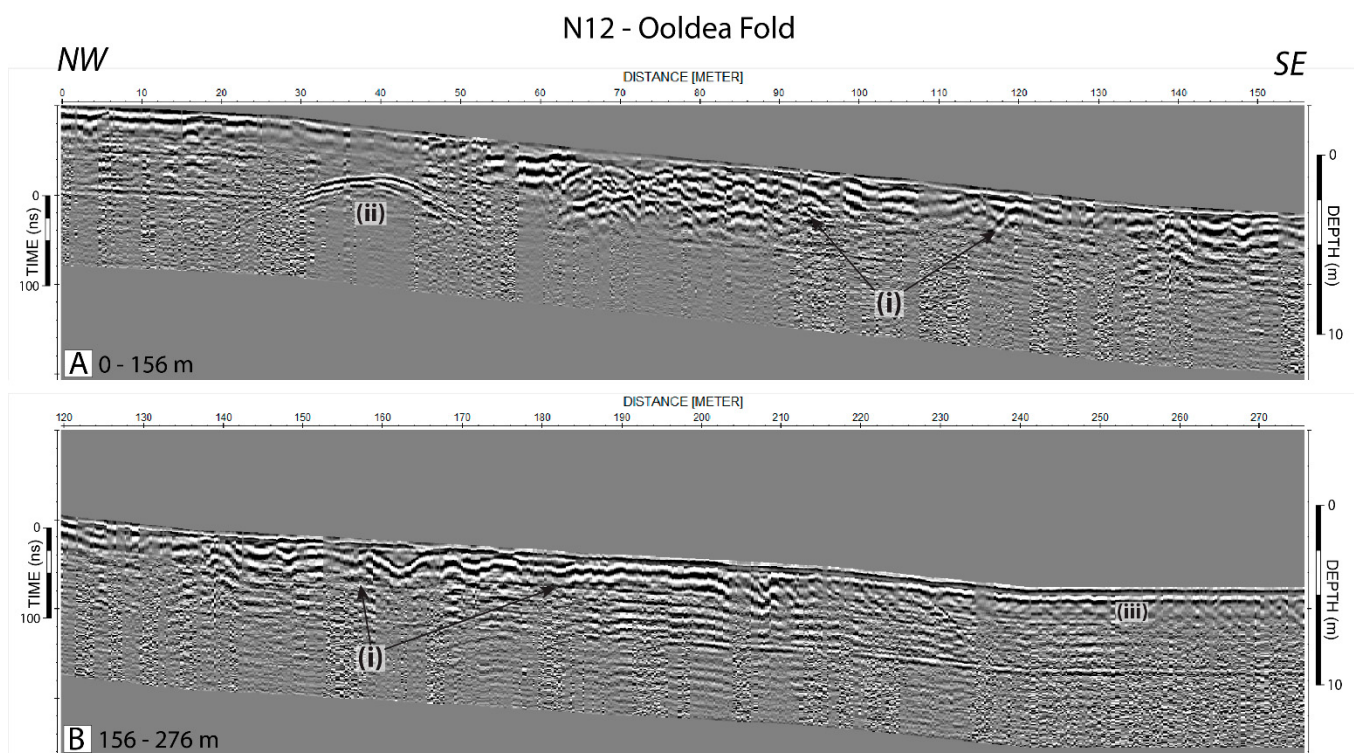

**Figure S21** Uninterpreted GPR transect N12.
