# Supplementary material for: Ground Penetrating Radar of Neotectonic Folds and Faults in South-Central Australia: Evolution of the Shallow Geophysical Structure of Fault-Propagation Folds with Increasing Strain
Source: MDPI journal article supplement (doi:10.3390/geosciences12110395), 2022-10-26
Supplement: s1 [file s1 › Supplementary Table S1.xlsx]

## Sheet: Table S1
GPR Acquisition parameters	Nullarbor/Roe												Willunga
	N1	N2	N3	N4	N5	N6	N7	N8	N9	N10	N11	N12	W1	W2	W3	W4	W5	W6	W7	W8	W9	W10
Antenna Frequency (MHz)	100	100	100	100	100	100	100	100	100	100	100	100	200	200	200	200	200	200	200	200	200	200
Trace Interval (m)	0.25	0.25	0.25	0.25	0.25	0.25	0.25	0.25	0.25	0.25	0.25	0.25	0.1	0.1	0.1	0.1	0.1	0.1	0.1	0.1	0.1	0.1
Time Window (ns)	1000	500	250	250	250	250	250	250	250	250	250	250	100	100	100	100	100	100	100	100	100	100
Number of Stacks	64	64	64	64	64	64	64	64	64	64	64	64	64	64	64	64	64	64	64	64	64	64
